# Supplementary material
Source: publisher figshare collection journal article supplement (https://karger.figshare.com/articles/dataset/_/5127712)
Supplement: Supplementary file 1 [file 1 › 000377649_sm_Figure.pdf]

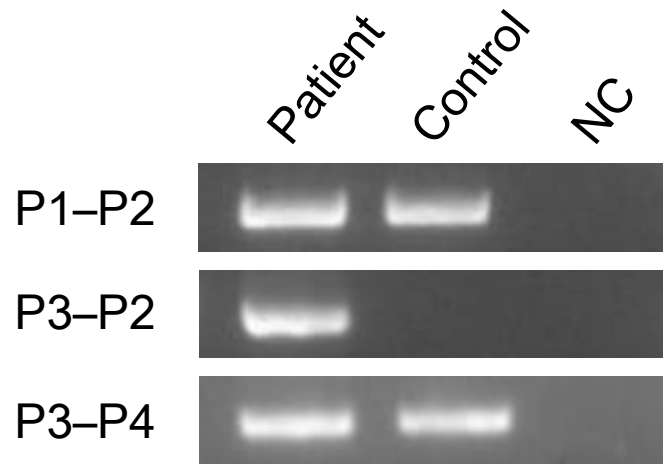

**Supplementary Figure 1.** Representative results of long-range PCR. P1-P4 indicate PCR primers shown in fig. 1c and online suppl. table 1. The P3-P2 products encompass the fusion junction. Control: a sample of an unaffected male individual; NC: negative control.
